# Supplementary material for: Synergetic effect between non-metals and dual metal catalysts for nitrogen reduction reaction
Source: Royal Society of Chemistry journal article supplement (doi:10.1039/d3qi00517h), 2023-01-01
Supplement: d3qi00517h1.pdf [file d3qi00517h1.pdf]

## Supplementary Information

### Synergetic Effect between Non-metals and Dual Metal Catalysts for Nitrogen Reduction Reaction

Ji Zhang<sup>1</sup>, Weisong Yang<sup>2</sup>, Chenghua Sun<sup>3,\*</sup>

- 1) Department of Electrical Engineering, Tongling University, Tongling, 244061, China
- 2) Department of Communication and Electronics, Jiangxi Science and Technology Normal University, Nanchang, 330013, China
- 3) Department of Chemistry and Biotechnology, Swinburne University of Technology, Hawthorn, VIC 3122, Australia

Number of tables: 3

Number of figures: 3

Table S1. Calculated  $\Delta ZPE$  and  $T\Delta S$  of gas molecules and intermediates on catalyst, the \* represent end-on mode, while \*\* represent side-on mode.

| <b>Fe<sub>2</sub>@BN<sub>4</sub></b> |              |             | <b>Fe<sub>2</sub>@SN<sub>4</sub></b> |              |             |
|--------------------------------------|--------------|-------------|--------------------------------------|--------------|-------------|
| species                              | $\Delta ZPE$ | $T\Delta S$ | species                              | $\Delta ZPE$ | $T\Delta S$ |
| N-N**                                | 0.20         | 0.11        | N-N**                                | 0.18         | 0.07        |
| N-NH**                               | 0.50         | 0.12        | N-NH**                               | 0.50         | 0.10        |
| NH-NH**                              | 0.81         | 0.13        | NH-NH**                              | 0.82         | 0.12        |
| NH-NH2**                             | 1.16         | 0.14        | NH-NH2**                             | 1.17         | 0.13        |
| NH2-NH2**                            | 1.34         | 0.20        | NH2-NH2**                            | 1.35         | 0.19        |
| NH2**                                | 0.70         | 0.07        | NH2**                                | 0.67         | 0.11        |
| NH3**                                | 1.02         | 0.16        | NH3**                                | 1.02         | 0.18        |
| <b>Co<sub>2</sub>@BN<sub>4</sub></b> |              |             | <b>Co<sub>2</sub>@PN<sub>4</sub></b> |              |             |
| species                              | $\Delta ZPE$ | $T\Delta S$ | species                              | $\Delta ZPE$ | $T\Delta S$ |
| N-N**                                | 0.20         | 0.11        | N-N*                                 | 0.21         | 0.14        |
| N-NH**                               | 0.50         | 0.11        | NNH*                                 | 0.48         | 0.15        |
| NH-NH**                              | 0.82         | 0.10        | NNH2*                                | 0.81         | 0.15        |
| NH-NH2**                             | 1.19         | 0.11        | N*                                   | 0.09         | 0.03        |
| NH2-NH2**                            | 1.49         | 0.16        | NH*                                  | 0.38         | 0.05        |
| NH2**                                | 0.73         | 0.07        | NH2*                                 | 0.72         | 0.06        |
| NH3**                                | 1.02         | 0.15        | NH3*                                 | 1.03         | 0.13        |
| <b>Ni<sub>2</sub>@PN<sub>4</sub></b> |              |             | gas                                  |              |             |
| species                              | $\Delta ZPE$ | $T\Delta S$ | species                              | $\Delta ZPE$ | $T\Delta S$ |
| N-N**                                | 0.19         | 0.13        | NH3                                  | 0.92         | 0.59        |
| N-NH**                               | 0.51         | 0.10        | H2                                   | 0.27         | 0.40        |
| NH-NH**                              | 0.81         | 0.12        | N2                                   | 0.15         | 0.59        |
| NH-NH2**                             | 1.17         | 0.12        |                                      |              |             |
| NH2-NH2**                            | 1.30         | 0.17        |                                      |              |             |
| NH2**                                | 0.71         | 0.06        |                                      |              |             |
| NH3**                                | 1.02         | 0.14        |                                      |              |             |

Table S2. The free energy of 15 catalysts via distal, alternating and enzymatic processes.

|         | Distal process      |       |       |       |        |       |       |
|---------|---------------------|-------|-------|-------|--------|-------|-------|
| Surface | N2                  | NNH   | NNH2  | N     | NH     | NH2   | NH3   |
| Fe2@NN4 | -0.84               | 0.15  | 0.24  | -0.50 | -0.82  | -1.35 | -1.63 |
| Fe2@BN4 | -0.81               | -0.48 | -0.34 | -1.03 | -1.54  | -2.42 | -1.46 |
| Fe2@ON4 | -1.02               | -0.15 | -0.55 | -0.79 | -1.58  | -2.26 | -1.65 |
| Fe2@SN4 | -1.13               | -0.84 | -1.00 | -1.69 | -2.07  | -2.71 | -2.36 |
| Fe2@PN4 | -0.72               | -0.11 | -0.41 | -0.81 | -1.48  | -2.43 | -1.46 |
| Co2@NN4 | -0.84               | 0.23  | 0.25  | -0.13 | -0.13  | -1.86 | -1.51 |
| Co2@BN4 | -0.73               | -0.35 | -0.26 | -0.94 | -1.31  | -1.91 | -1.52 |
| Co2@ON4 | -1.13               | -0.11 | -0.24 | -0.43 | -1.25  | -1.79 | -1.69 |
| Co2@SN4 | -0.68               | -0.13 | 0.16  | -0.58 | -1.01  | -1.32 | -1.21 |
| Co2@PN4 | -0.37               | -0.03 | -0.09 | -0.47 | -1.15  | -1.40 | -1.17 |
| Ni2@NN4 | -0.79               | 0.45  | 0.88  | 0.98  | 0.05   | -1.02 | -1.54 |
| Ni2@BN4 | -0.54               | 0.39  | 0.35  | 0.29  | -0.41  | -1.44 | -1.53 |
| Ni2@ON4 | -0.58               | -0.28 | -0.30 | 0.36  | -0.87  | -1.77 | -1.71 |
| Ni2@SN4 | -0.17               | 0.74  | 0.40  | 0.74  | -0.13  | -1.06 | -0.78 |
| Ni2@PN4 | -0.36               | 0.69  | 0.66  | 0.92  | -0.21  | -1.39 | -1.11 |
|         | Alternating process |       |       |       |        |       |       |
| Surface | N2                  | NNH   | NHNH  | NHNH2 | NH2NH2 | NH2   | NH3   |
| Fe2@NN4 | -0.87               | 0.15  | 0.63  | -0.38 | -0.56  | -1.29 | -1.68 |
| Fe2@BN4 | -0.81               | -0.48 | 0.12  | -0.31 | 0.30   | -0.87 | -1.51 |
| Fe2@ON4 | -1.02               | -0.15 | -0.33 | 0.28  | 0.50   | -2.25 | -1.65 |
| Fe2@SN4 | -1.13               | -0.84 | -0.03 | -0.82 | -0.41  | -2.30 | -2.36 |
| Fe2@PN4 | -0.72               | -0.11 | 0.04  | -0.34 | 0.52   | -1.98 | -1.46 |
| Co2@NN4 | -0.85               | 0.21  | 0.68  | -0.32 | -0.35  | -1.87 | -1.51 |
| Co2@BN4 | -0.73               | -0.35 | 0.40  | -0.03 | 0.69   | -0.91 | -1.52 |
| Co2@ON4 | -1.13               | -0.11 | -0.16 | 0.11  | 0.27   | -1.76 | -1.69 |
| Co2@SN4 | -0.68               | -0.14 | 0.18  | 0.37  | 0.39   | -1.55 | -1.21 |
| Co2@PN4 | -0.37               | -0.03 | 0.27  | 0.14  | -0.39  | -1.66 | -1.17 |
| Ni2@NN4 | -0.82               | 0.42  | 0.60  | -0.05 | 0.39   | -0.98 | -1.57 |
| Ni2@BN4 | -0.54               | 0.39  | 0.52  | 0.35  | 0.29   | -0.76 | -1.53 |
| Ni2@ON4 | -0.58               | -0.28 | -0.26 | 0.20  | 0.31   | -1.64 | -1.71 |
| Ni2@SN4 | -0.17               | 0.74  | 0.69  | 0.52  | 0.45   | -1.10 | -0.78 |
| Ni2@PN4 | -0.36               | 0.69  | 0.99  | 0.43  | 0.48   | -0.53 | -1.11 |
|         | Enzymatic process   |       |       |       |        |       |       |
| Surface | N2                  | NNH   | NHNH  | NHNH2 | NH2NH2 | NH2   | NH3   |

|         |       |       |       |       |       |       |       |
|---------|-------|-------|-------|-------|-------|-------|-------|
| Fe2@NN4 | 0.05  | 0.23  | 0.28  | -0.16 | 0.36  | -1.53 | -1.57 |
| Fe2@BN4 | 0.07  | 0.18  | -0.08 | -0.19 | -1.14 | -0.87 | -1.56 |
| Fe2@ON4 | -0.37 | -0.15 | -0.55 | -0.53 | -1.22 | -2.25 | -1.69 |
| Fe2@SN4 | -0.82 | -0.62 | -1.06 | -1.15 | -2.13 | -2.37 | -2.41 |
| Fe2@PN4 | -0.07 | 0.13  | -0.24 | 0.08  | -1.18 | -2.33 | -1.36 |
| Co2@NN4 | -0.12 | 0.49  | 0.49  | -0.05 | 0.09  | -1.47 | -1.67 |
| Co2@BN4 | -0.25 | 0.11  | 0.10  | 0.19  | 0.45  | -0.89 | -1.38 |
| Co2@ON4 | -0.47 | 0.10  | -0.38 | -0.32 | -0.98 | -1.80 | -1.79 |
| Co2@SN4 | -0.29 | 0.07  | 0.06  | 0.20  | -0.57 | -1.50 | -1.50 |
| Co2@PN4 | -0.19 | 0.20  | -0.03 | -0.11 | -0.68 | -1.66 | -1.21 |
| Ni2@NN4 | -0.55 | 0.74  | 0.36  | -0.04 | 0.04  | -1.45 | -1.93 |
| Ni2@BN4 | 0.02  | 0.44  | 0.53  | 0.22  | 0.75  | -0.76 | -1.62 |
| Ni2@ON4 | -0.53 | -0.14 | -0.25 | -0.13 | -0.38 | -1.73 | -1.73 |
| Ni2@SN4 | -0.66 | 0.55  | 0.55  | 0.51  | 0.27  | -1.18 | -1.41 |
| Ni2@PN4 | 0.13  | 0.46  | 0.61  | 0.24  | 0.55  | -1.31 | -0.98 |

Table S3. The bader charge  $Q_{N_2}$  and bond length  $d_{N-N}$  of  $N_2$  adsorbed on 15 catalysts with end-on and side-on configurations; the binding energy  $E_b$  of transition metal atom pairs anchored on the slab calculated by the energies of metal atoms in the vacuum and the bulk metal ( $E_{coh}$ ).

| Surface | $Q_{N_2}^{end-on}$ | $d_{N-N}^{end-on}$ | $Q_{N_2}^{side-on}$ | $d_{N-N}^{side-on}$ | $E_b(vacuum)$ | $E_b(bulk)$ | $E_{coh}$ |
|---------|--------------------|--------------------|---------------------|---------------------|---------------|-------------|-----------|
| Fe2@NN4 | 0.33               | 1.17               | 0.57                | 1.20                | 5.11          | 4.02        | 4.28      |
| Fe2@BN4 | 0.51               | 1.17               | 0.71                | 1.21                | 5.46          | 4.36        | 4.28      |
| Fe2@ON4 | 0.51               | 1.16               | 0.70                | 1.22                | 4.36          | 3.25        | 4.28      |
| Fe2@SN4 | 0.58               | 1.17               | 0.67                | 1.22                | 3.03          | 1.94        | 4.28      |
| Fe2@PN4 | 0.56               | 1.17               | 0.79                | 1.23                | 4.90          | 3.81        | 4.28      |
| Co2@NN4 | 0.35               | 1.16               | 0.47                | 1.18                | 5.39          | 2.72        | 4.39      |
| Co2@BN4 | 0.44               | 1.16               | 0.57                | 1.20                | 5.76          | 3.09        | 4.39      |
| Co2@ON4 | 0.49               | 1.16               | 0.52                | 1.19                | 4.65          | 1.98        | 4.39      |
| Co2@SN4 | 0.53               | 1.16               | 0.63                | 1.19                | 4.80          | 2.13        | 4.39      |
| Co2@PN4 | 0.51               | 1.16               | 0.63                | 1.19                | 5.36          | 2.69        | 4.39      |
| Ni2@NN4 | 0.23               | 1.16               | 0.42                | 1.14                | 5.45          | 1.33        | 4.44      |
| Ni2@BN4 | 0.35               | 1.16               | 0.49                | 1.18                | 5.33          | 1.21        | 4.44      |
| Ni2@ON4 | 0.46               | 1.16               | 0.47                | 1.18                | 4.79          | 0.67        | 4.44      |
| Ni2@SN4 | 0.40               | 1.16               | 0.32                | 1.14                | 5.04          | 0.92        | 4.44      |
| Ni2@PN4 | 0.41               | 1.16               | 0.48                | 1.19                | 5.51          | 1.39        | 4.44      |
| Fe@SN4  | 0.32               | 1.14               | 0.33                | 1.17                | 5.39          | 4.31        | 4.28      |

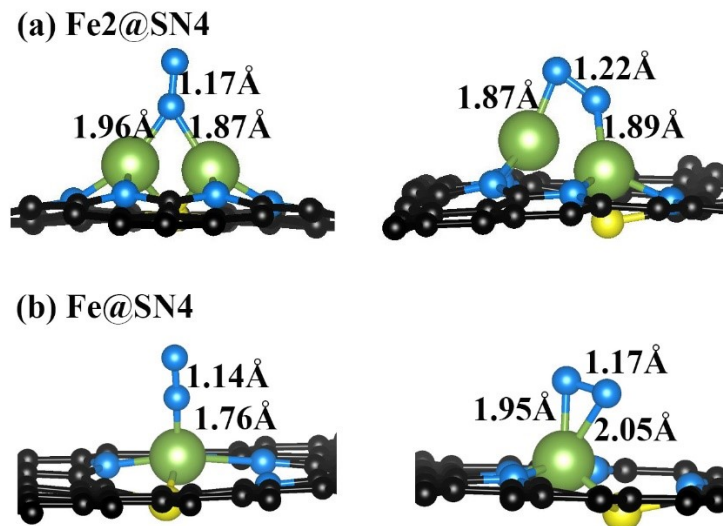

Figure S1. The structures of N<sub>2</sub> adsorbed on (a) Fe<sub>2</sub>@SN<sub>4</sub> and (b) Fe@SN<sub>4</sub> with end-on and side-on configurations.

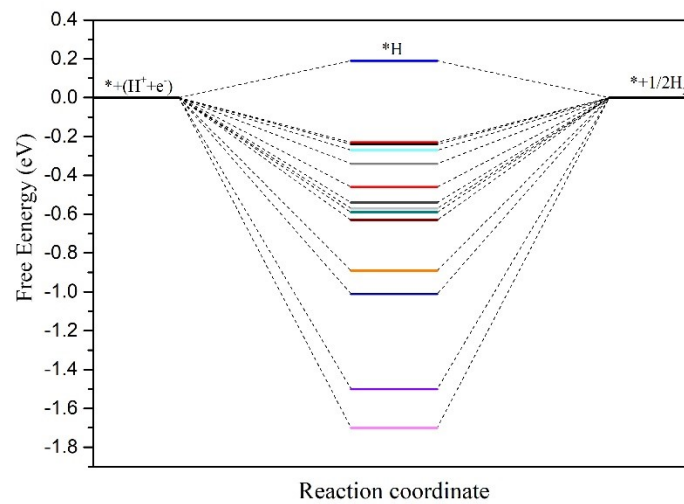

Figure S2. Free energy diagram of DACs for HER.

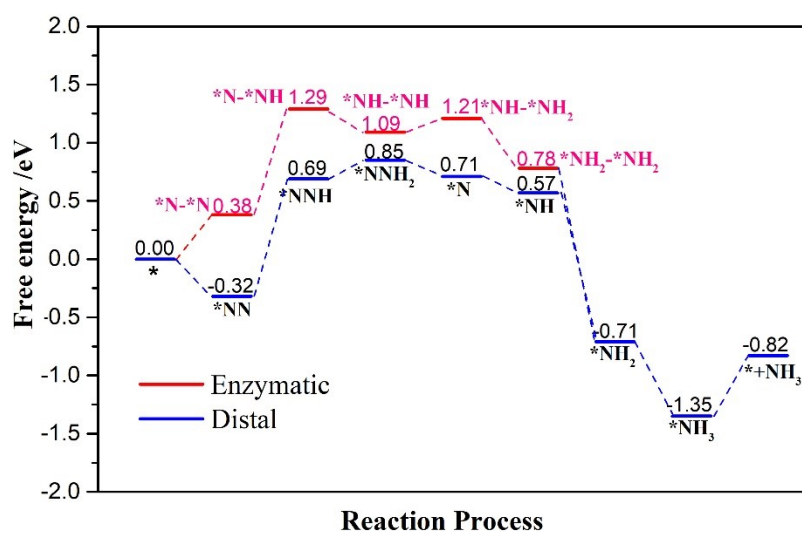

Figure S3. The calculated free energy profiles for NRR through enzymatic mechanism and distal mechanism on Fe@SN<sub>4</sub>.
